# Supplementary material for: Vaccination against neoantigens induced in cross-priming cDC1 in vivo
Source: Springer Nature journal article supplement (doi:10.1007/s00262-023-03597-y), 2024-01-01
Supplement: MOESM1 [file 26635754]

## SUPPLEMENTARY INFORMATION.

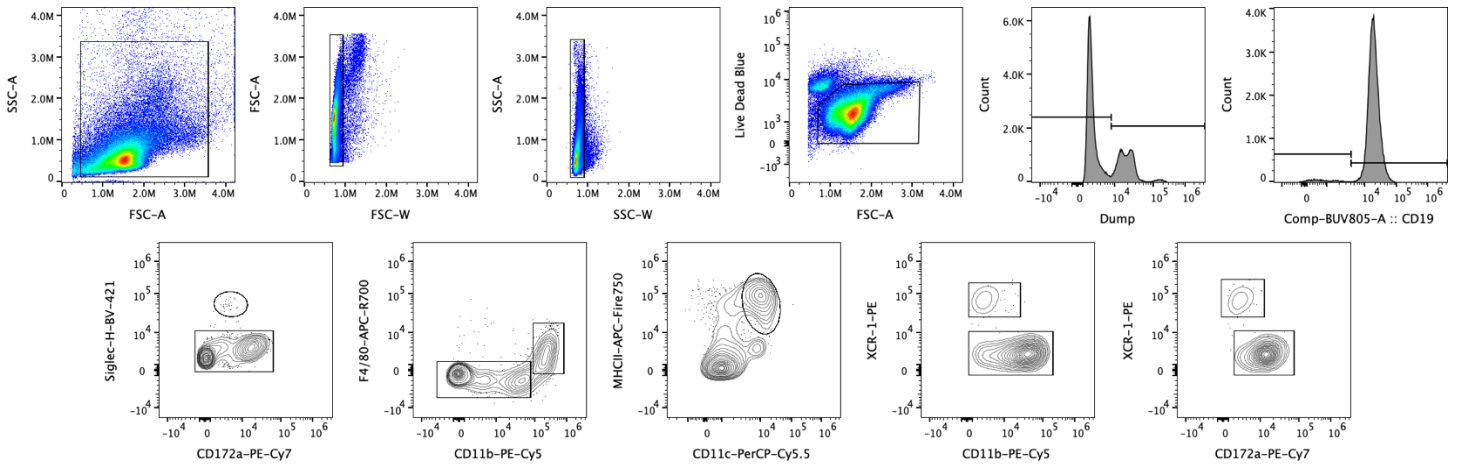

**Fig. S1. Gating Strategy for Immune Cell Subsets shown in Figs. 2 and 6C).** Dump+ (CD3<sup>+</sup> (T cells), CD49b<sup>+</sup> (NK Cells), and Ly-6G<sup>+</sup> (neutrophils)) were gated out of live, singlet splenocytes. Next, B cells (Dump-CD19<sup>+</sup>) were gated. Dump-CD19<sup>-</sup> were then gated based on Siglec-H expression: Siglec-H<sup>+</sup> (pDC) and Siglec-H<sup>-</sup>. F4/80 was then used to gate macrophages (Macs; F4/80<sup>+</sup>). DCs were gated out of the F4/80<sup>-</sup> cells based on their high expression of MHCII and CD11c. XCR-1 and CD11b or XCR-1 and CD172a were then used to separate cDC1 (XCR-1<sup>+</sup>CD11b<sup>-</sup>CD172a<sup>-</sup>) from cDC2 (XCR-1<sup>-</sup>CD11b<sup>+</sup>CD172a<sup>+</sup>).

### Summary:

B cells: (Dump-CD19<sup>+</sup>)

pDC: (Dump-CD19<sup>-</sup>SiglecH<sup>+</sup>)

Macrophages: (Dump-CD19<sup>-</sup>SiglecH<sup>-</sup>F4/80<sup>+</sup>)

cDC1: (Dump-CD19<sup>-</sup>SiglecH<sup>-</sup>F4/80<sup>-</sup>MHCII<sup>+</sup>CD11c<sup>+</sup>XCR<sup>+</sup>CD11b<sup>-</sup>CD172a<sup>-</sup>)

cDC2 : (Dump-CD19<sup>-</sup>SiglecH<sup>-</sup>F4/80<sup>-</sup>MHCII<sup>+</sup>CD11c<sup>+</sup>XCR<sup>-</sup>CD11b<sup>+</sup>CD172a<sup>+</sup>)
